# Supplementary material for: Unique Evolution of SARS-CoV-2 in the Second Large Cruise Ship Cluster in Japan
Source: MDPI journal article supplement (doi:10.3390/microorganisms10010099), 2022-01-04
Supplement: s1 [file s1]

## Supplementary Materials

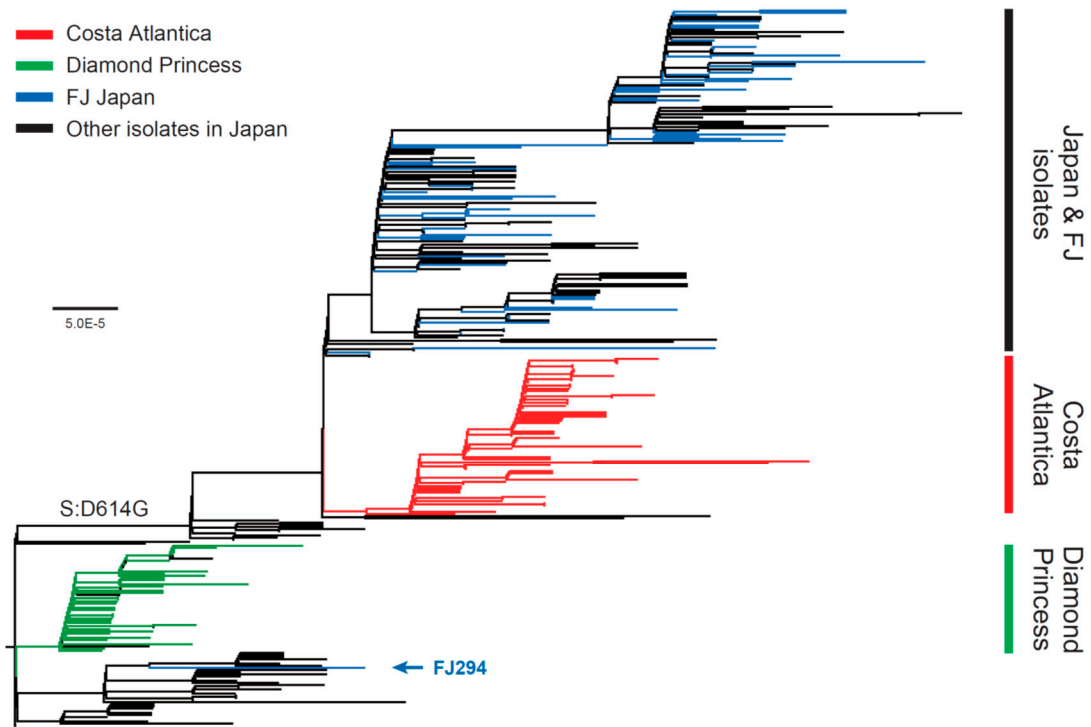

**Figure S1.** Maximum likelihood phylogeny of SARS-CoV-2 whole-genome sequences detected in the Costa Atlantica and Diamond Princess cruise ship clusters together with the reference sequences only from Japan. Scale bar depicts nucleotide substitutions per site.

**Table S1.** Diagnostic tests of crew members in Costa Atlantica in April, 2020.

| <b>Costa Atlantica</b> |                  |          |      | <b>Diamond Princess</b> |        |          |      |
|------------------------|------------------|----------|------|-------------------------|--------|----------|------|
| Date                   | Tested           | Positive | %    | Date                    | Tested | Positive | %    |
| Apr 20                 | 4 <sup>1</sup>   | 1        | 25.0 | Feb                     | 3,618  | 712      | 19.7 |
| Apr 21                 | 57               | 33       | 57.9 |                         |        |          |      |
| Apr 22                 | 66               | 14       | 21.2 |                         |        |          |      |
| Apr 23                 | 208              | 43       | 20.7 |                         |        |          |      |
| Apr 24                 | 289 <sup>2</sup> | 57       | 19.7 |                         |        |          |      |
| Apr 25                 | 1 <sup>2</sup>   | 0        | 0    |                         |        |          |      |
| Total                  | 623 <sup>3</sup> | 148      | 23.8 |                         |        |          |      |

<sup>1</sup> Samples were tested by RT-qPCR.

<sup>2</sup> The number of test samples included re-test samples.

<sup>3</sup> Re-test samples were excluded.

**Table S2.** Acquired common amino acid substitutions between groups.

| Group | Number          | Mutation | Protein       | Substitution |
|-------|-----------------|----------|---------------|--------------|
| CA    | 1               | T4346C   | ORF1a         | S543P        |
| FJ    | 35              |          | NSP3          |              |
| DP    | 1               | C9474T   | ORF1a         | A307V        |
| FJ    | 1               |          | NSP4          |              |
| CA    | 1               | G11083T  | ORF1a<br>NSP6 | L37F         |
| DP    | 71 <sup>1</sup> |          |               |              |
| FJ    | 2               |          |               |              |
| CA    | 1               | G15982T  | ORF1b         | V839L        |
| FJ    | 1               |          | NSP12b        |              |
| DP    | 1               | C21575T  | S             | L5F          |
| FJ    | 2               |          |               |              |

<sup>1</sup> The originally introduced strain into the DP cruise ship possessed this mutation.  
FJ, FJ Japan; CA, Costa Atlantica; DP, Diamond Princess.

**Table S3.** Characteristics of the haplotype of each SARS-CoV-2 group.

| Group       | Haplotype         |                   |
|-------------|-------------------|-------------------|
|             | Segregating sites | Informative sites |
| FJ          | 154               | 36                |
| CA          | 72                | 20                |
| DP          | 48                | 5                 |
| England     | 211               | 94                |
| California  | 641               | 241               |
| France      | 564               | 281               |
| Paris-LD    | 258               | 71                |
| Milan-LD    | 296               | 79                |
| Moscow-LD   | 195               | 44                |
| Austria-SSE | 34                | 1                 |

FJ, FJ Japan; CA, Costa Atlantica; DP, Diamond Princess; LD, Lockdown; SSE, Superspreading event.
